# Supplementary material for: Factors Influencing Willingness to Pursue Living Kidney Donation Among Relatives of Patients with Kidney Disease in the United States
Source: Research Square preprint supplement (doi:10.21203/rs.3.rs-8212449/v1), 2025-12-09
Supplement: Supplementary file 1 [file 031b7b544438e78fee06f5fc.docx]

Table of Contents

[Supplemental Section A: Development of the Patient-Facing Reason Measures 2](#_Toc214031150)

[Table A1: Qualitative Codebook for Reasons For, Against, and Ambivalent About LDKT (MTurk Pilot, 2016) 6](#_Toc214031151)

[Table A2: Experiment-Adjusted Percentages of Grandparent, Parent, and Child Qualitative Codes 10](#_Toc214031152)

[Table B: Descriptive Statistics, Reasons for and Against Living Kidney Donation Willingness, FoRPS Wave 2 12](#_Toc214031153)

[Table C: Association of LDKT Reasons with Number of LDKT Actions Taken 13](#_Toc214031154)

# **Supplemental Section A: Development of the Potential Living Donor-Facing Reason Measures**

To build the patient-facing list of reasons, a pilot experimental-vignette survey on Amazon Mechanical Turk (MTurk) was fielded in 2016 (N=2,170). Respondents were randomly assigned a relationship tie from their own networks and read a scenario that experimentally varied several factors such as presented disease cause and donor impacts. Each respondent then rated willingness to donate (1-9) and provided an open-ended explanation. The open-ended data was used to create a hierarchical qualitative codebook, with “grandparent” (positive/negative/neutral), “parent” (non-specific), and “child” codes. After the principal investigator drafted a preliminary scheme from a 10% subsample, two research assistants and the team refined codes to saturation, then applied them in a Qualtrics coding instrument where the principal investigator adjudicated disagreements. Codes were coded non-exclusively, applying as many codes as fit the text as elements of reasoning in the respondent’s text response regardless of ultimate decision. Inter-rater reliability was very high (frequency-weighted k=0.82 for less-detailed codes, and k=0.74 for more-detailed codes. Regression-adjusted prevalence of each reason was then estimated and identified the most common themes to emphasize and address. Using those themes, a conversational script was drafted addressing the most common reasons invoked. In 2017, alternative phrasings of draft scripts were A/B-tested among two new MTurk samples (N=1,863; N=1,756), and these respondents open-ended responses were also qualitatively coded using the codebook developed using the 2016 survey. The most common reasons for and against donation were then used as the basis for the reasons questionnaire variable used in FoRPS and FFKTPS.

Table A1 presents the resulting qualitative codebook. The distribution of these codes in mTurk 1 is described in the next section. Parent codes A through G were grouped under the ‘Against’ grandparent code. Code A is ‘Bad Relationship Reasons’, which captures antagonism and relative indifference toward the potential recipient. Code B is ‘Health, Risk, & Matching Reasons’, which incorporates a variety of health-related reasons – fear of surgery, negative health effects of donation, poor current health status, fear that the disease runs in the family, doubt about being an adequate match, and vague invocations of risk. Code C is ‘Fear of Non-Health Consequences’, which largely concerns missed work, foregone income, general financial concerns, and recovery time. Code D is ‘Relationship Restrictions’, which captures divisions between individuals respondents would and would not consider donating to, which can be imagined as a series of concentric circles – children are always included, then sometimes close family, then any family, then for family and friends. Other child codes within parent code D specifically exclude a particular relationship type (usually coworkers), highlight other potential donors who they deem more appropriate, or invoke the respondent’s family responsibilities. Code E is ‘Recipient Attributes’, which highlights various non-relational aspects of the potential recipient that exclude them from consideration – their advanced age, likely refusal of offers, their blame for their situation, or distance. Code F is ‘Would Not Donate’, which describes a set of reasons that respondents invoke that they would not donate a kidney to anyone under their circumstances – for religious/spiritual reasons, total exclusion, exclusion of living donation, a desire to keep one’s kidneys, a preference to simply let the alter die, self-interest, or a meaningful invocation of their kidney as a part of their body. Code G captures reasons ‘against’ donation not otherwise categorized.

Parent codes H through K index reasons for ambivalence about donation. Code H (‘Depends on… / Need more…’) combines a wide variety of additional sources of information that respondents say they would need to make a decision. Code I (‘Testing-Related Reasons’) separates out reasons directly associated with the results of the donor evaluation protocols. Code J (‘On the one hand, On the Other’) codes responses where both positive and negative reasons were invoked relatively equally. Code K captures other sources of ambivalence that are not otherwise categorized.

Parent codes L through Q describe broad reasons ‘for’ donation. Code L (‘Good Relationship Reasons’) captures responses invoking positive aspects of their relationship with the alter, such as positively invoking their relationship (e.g., “It’s my mom”) or familial (e.g., “They’re family!”) status, expressing relationship-oriented values, invoking histories of support and reciprocity, intensified expression of willingness, feelings of love and closeness. Code M (‘Moral, ethical, religious, and emotional reasons’) incorporates reasons like what respondents view as right, would feel good, sympathy, non-relationship values, potential guilt for not donating, social repercussions for not donating, and religious motivations. Code N (‘Benefit Recipient’) focuses on reasoning related to how donation would benefit the recipient, such as by saving their life, improving their quality of life, helping them avoid suffering, giving them a ‘gift’, ‘help’ing them to unspecified ends, and avoiding a long wait for a deceased donor transplant. Code O (‘Medical reasons could donate’) covers reasoning such as the respondent’s good health, the fact that they have a ‘spare’ kidney (e.g., “You only need one kidney!”), the likelihood they would be a match for the recipient, and implied conditional statements expressing cautious optimism that the evaluation process would not turn up anything concerning. Code P (‘Non-medical reasons could donate’) covers reasons that respondents could donate such as being unemployed or flexibly employed. Code Q covers ‘for’ reasons not otherwise categorized.

Table A2 presents each grandparent, parent, and child code’s regression-adjusted proportions in the mTurk wave 1 data. We regression-adjusted because the data collected included experimental manipulations that might bias the popularity of certain qualitative codes. Thus, all proportions are the marginal proportion in which the given code was assigned after controlling for experimental (direct/indirect, cause, recipient effects, donor effects) and conditionally random (relationship) characteristics. The percentages are displayed as percentage of the sample as well as the upward-abutting coding level (grandparents for parent codes; parents for child codes).

At the grandparent level, ‘for’ codes are the most common – 60.9% of respondents invoked at least one ‘for’ code, 39.9% did so for ‘against’ codes, and 17.4% did so for ‘ambivalent’ codes. (These figures do not add to 100 because more than one grandparent code could apply to a given response.) At the parent level, 5 codes are found in 10% or more of responses, and four of them are ‘for’ and one ‘against’. The most common ‘for’ codes are Benefit Recipient (code N; 40.6%), Good Relationship Reasons (L; 34.0%), Medical Reasons Could Donate (O; 13.1%), and Moral, Ethical, Religious, and Emotional Reasons (M; 10.6%). The most common ‘against’ code was Health, Risk, & Matching (B; 26.7%).

The most common child codes for each parent code are also displayed in Table 4. Overall, the ten most common ‘for’ child codes were Would Do Anything (code 57; 17.3%); Vague “Help” (code 73; 15.7%); Save recipient's life, help recipient live longer (code 69; 12.8%); Positive, specific relationship invocation (code 52; 9.1%); Shortened life, worsened health (code 5; 7.6%); Respondent in poor health / has disqualifying health condition (code 6; 7.5%); Not close enough (code 2; 5.0%); “Love” (code 58; 4.9%); Improve recipient quality of life (code 70; 4.9%); and Invocation of non-family/relationship values (code 64; 4.6%).

## **Table A1: Qualitative Codebook for Reasons For, Against, and Ambivalent About LDKT (MTurk Pilot, 2016)**

| **Grandparent** | **Parent** | | **Child** | |
| --- | --- | --- | --- | --- |
| **Code** | **Code** | **Description** | **Code** | **Description** |
| Against | A | Bad Relationship Reasons | 1 | "I dislike/hate them"; "They dislike/hate me" |
| 2 | Not close enough |
| 3 | Other bad relationship reasons |
| B | Health, Risk, & Matching Reasons | 4 | Fear of surgery; "Don't like doctors/hospitals" |
| 5 | Shortened life; worsened health |
| 6 | Respondent in poor health / has disqualifying health condition |
| 7 | Disease that may run in family |
| 8 | Would not be a match |
| 9 | Vague "risk" |
| 10 | Other health and matching reasons |
| C | Fear of Non-Health Consequences | 11 | Missed work; Lost income; Could lose job |
| 12 | Cost of medical care/insurance concerns |
| 13 | Fear of other or unspecified financial consequences |
| 14 | (Recovery) time |
| 15 | Other fear reasons, including non-specific fear or unmentioned consequences |
| D | Relationship Restrictions | 16 | Save for kids |
| 17 | Save for close family |
| 18 | Save for any family |
| 19 | Save for family and friends |
| 20 | Not for a ___ |
| 21 | "They have their own family/kids" |
| 22 | Responsibilities to family |
| 23 | Other relationship restrictions |
| E | Recipient Attributes | 24 | Too old |
| 25 | Would refuse offer |
| 26 | "Their own fault"; lifestyle |
| 27 | Too far away |
| 28 | Other recipient attributes |
| F | Would Not Donate | 29 | Religious or spiritual reasons |
| 30 | Not even if deceased |
| 31 | Only if deceased |
| 32 | "I need/want to keep my kidneys" |
| 33 | "Just let them die"; mentions overpopulation, pointlessness of care |
| 34 | "Selfish"; mentions self-interest |
| 35 | "Part of my body" |
| 36 | Other would not donate reasons |
| G | Other reasons against | 37 | Other reasons against |
| Ambivalent | H | Depends on…/ Need more… | 38 | Depends on who exactly |
| 39 | Depends on whether someone else could do it |
| 40 | Depends on reason for the disease |
| 41 | Depends on the urgency / gravity / nearness of death |
| 42 | Depends on what my spouse / family says |
| 43 | Need more information |
| 44 | Need more time to think |
| 45 | Depends on / Need more of something else |
| I | Testing-related reasons | 46 | Depends on results of the test/exam |
| 47 | At least get tested, then decide |
| 48 | Get tested, but hope not a match |
| 49 | Other testing concerns |
| J | On one hand, on the other | 50 | On one hand, on the other |
| K | Other reasons ambivalent | 51 | Other reasons ambivalent |
| For | L | Good relationship reasons | 52 | Positive, specific relationship invocation |
| 53 | Positive “family” invocation |
| 54 | Relationship-oriented values |
| 55 | "They would do it for me" |
| 56 | They've done so much for each other |
| 57 | Would do anything |
| 58 | "Love" |
| 59 | Expressions of closeness, not otherwise classified |
| 60 | Other positive relationship reasons |
| M | Moral, ethical, religious, and emotional reasons | 61 | "Right thing to do" |
| 62 | It would feel good to do |
| 63 | Would be grateful in their place; sympathy |
| 64 | Invocation of non-family/relationship values |
| 65 | Would feel guilty if didn't |
| 66 | Social repercussions if didn't |
| 67 | Spiritual and religious motivations |
| 68 | Other moral and emotional reasons |
| N | Benefit recipient | 69 | Save recipient's life; help recipient live longer |
| 70 | Improve recipient quality of life |
| 71 | Help recipient avoid suffering / end sickness |
| 72 | "Gift" |
| 73 | Vague "Help" |
| 74 | Avoid a long wait (for a deceased donor kidney) |
| 75 | Other benefit recipient reasons |
| O | Medical reasons could donate | 76 | Healthy respondent |
| 77 | Spare kidney |
| 78 | Likely match |
| 79 | Don’t anticipate health consequences; Assuming we match |
| 80 | Other medical reasons could donate |
| P | Non-medical reasons could donate | 81 | Not employed |
| 82 | Flexible employment |
| 83 | Other non-medical reasons could donate |
| Q | Other for reasons | 84 | Other reasons 'for' |

## **Table A2: Experiment-Adjusted Percentages of Grandparent, Parent, and Child Qualitative Codes**

| **Grandparent Code** | **Description** | **Regression-Adjusted %** | **Share of Grandparent Code** | **Most Common Child Code** | **Description** | **Regression-Adjusted %** | **Share of Parent Code** |
| --- | --- | --- | --- | --- | --- | --- | --- |
| Against Codes (39.9%) | |  |  |  |  |  |  |
| B | Health, Risk, & Matching Reasons | 26.7% | 50.4% | 5 | Shortened Life; Worsened Health | 7.6% | 32.3% |
| D | Relationship Restrictions | 9.6% | 18.1% | 18 | Save for Any Family | 3.3% | 28.2% |
| A | Bad Relationship Reasons | 6.9% | 13.0% | 2 | Not Close Enough | 5.0% | 74.7% |
| F | Would Not Donate | 6.4% | 12.1% | 32 | "I need/want to keep my kidneys" | 3.0% | 40.7% |
| C | Fear of Non-Health Consequences | 2.0% | 3.8% | 11 | Missed work; Lost income; Could lose job | 2.0% | 43.3% |
| E | Recipient Attributes | 1.4% | 2.6% | 26 | "Their own fault"; lifestyle | 2.0% | 50.6% |
| G | Other | 0.0% | 0.0% | -- | -- | -- | -- |
| Ambivalent Codes (17.4%) | |  |  |  |  |  |  |
| H | Depends on / Need More | 6.8% | 38.4% | 43 | Need more information | 3.0% | 26.1% |
| I | Testing-Related Reasons | 5.2% | 29.4% | 47 | At least get tested, then decide | 2.4% | 56.4% |
| J | On One Hand, On the Other | 4.1% | 23.2% | -- | -- | -- | -- |
| K | Other | 1.6% | 9.0% | -- | -- | -- | -- |
| For Codes (60.9%) | |  |  |  |  |  |  |
| N | Benefit Recipient | 40.6% | 40.8% | 73 | Vague "Help" | 15.7% | 42.2% |
| L | Good Relationship Reasons | 34.0% | 34.2% | 57 | Would do anything | 17.3% | 38.1% |
| O | Medical reasons could donate | 13.1% | 13.2% | 79 | Don’t anticipate health consequences; Assuming we match | 4.5% | 49.3% |
| M | Moral, ethical, religious, and emotional reasons | 10.6% | 10.7% | 64 | Invocation of non-family/relationship values | 4.6% | 35.0% |
| Q | Other | 0.8% | 0.8% | -- | -- | -- | -- |
| P | Non-Medical Could Donate | 0.3% | 0.3% | 82 | Flexible employment | 0.5% | 44.4% |

# **Table B: Descriptive Statistics, Reasons for and Against Living Kidney Donation Willingness, FoRPS Wave 2**

| **Reason** | **% Less Likely** | **% Neither** | **% More Likely** | **Salience** | **Consensus** |
| --- | --- | --- | --- | --- | --- |
| Financial reasons | 20.61 | 61.04 | 18.35 | 38.96 | -1.12 |
| Likelihood of being a match | 9.86 | 32.14 | 58.00 | 67.86 | +5.88 |
| Whether you are healthy enough | 19.21 | 28.67 | 52.12 | 71.33 | +2.71 |
| Knowledge of living kidney donation | 12.16 | 48.29 | 39.55 | 51.71 | +3.25 |
| Your relationship with this person | 10.43 | 23.72 | 65.85 | 76.28 | +6.31 |
| Moral, religious, or ethical reasons | 15.90 | 49.42 | 34.68 | 50.58 | +2.18 |
| How could affect rest of your family | 19.16 | 39.76 | 41.08 | 60.24 | +2.14 |
| Your views on organ donation | 13.23 | 45.80 | 40.97 | 54.20 | +3.10 |
| Extending this person's life | 10.22 | 24.70 | 65.09 | 75.31 | +6.37 |
| How this could affect your health | 29.28 | 40.74 | 29.98 | 59.26 | +1.02 |
| The surgery | 28.80 | 44.28 | 26.93 | 55.73 | -1.07 |
| Improving their quality of life | 7.36 | 29.54 | 63.10 | 70.46 | +8.57 |
| Post-surgical recovery | 25.30 | 47.51 | 27.19 | 52.49 | +1.07 |
| Characteristics not listed above | 12.27 | 56.26 | 31.46 | 43.73 | +2.56 |

NOTE: Salience is the % of respondents not marking “neither more likely nor less likely”; consensus is the ratio of % marking the max value out of less likely and more likely divided by the % marking the minimum value out of less likely and more likely. FoRPS stands for Families of Renal Patients Study, a sample of family members of kidney disease patients. Values are weighted.

# **Table C: Association of LDKT Reasons with Number of LDKT Actions Taken**

|  | **Unadjusted Model** | | **Adjusted Model** | |
| --- | --- | --- | --- | --- |
| **Reason** | **Less Willing** | **More Willing** | **Less Willing** | **More Willing** |
| Whether you are healthy enough | -0.323 (0.070)** | 0.233 (0.078)** | -0.267(0.069)** | 0.217(0.072)** |
| Likelihood of being a match | 0.124 (0.109) | 0.380 (0.071)** | 0.150(0.104) | 0.310(0.067)** |
| Your relationship with this person | 0.021 (0.107) | 0.215 (0.080)** | 0.062(0.098) | 0.204(0.073)** |
| Extending this person's life | -0.122 (0.106) | 0.174 (0.078)* | -0.069(0.110) | 0.157(0.075)* |
| How could affect rest of your family | -0.105 (0.097) | 0.132 (0.082) | -0.032(0.092) | 0.138(0.073) |
| Your views on organ donation | -0.330 (0.080)** | 0.146 (0.083) | -0.298(0.086)** | 0.099(0.075) |
| Post-surgical recovery | -0.198 (0.075)** | 0.045 (0.104) | -0.118(0.073) | 0.002(0.090) |
| The surgery | -0.187 (0.091)* | -0.013 (0.089) | -0.058(0.090) | -0.047(0.074) |
| Financial reasons | -0.117 (0.081) | 0.159 (0.116) | -0.114(0.081) | 0.050(0.098) |
| Knowledge of living kidney donation | -0.143 (0.104) | 0.117 (0.082) | -0.157(0.089) | 0.059(0.073) |
| Moral, religious, or ethical reasons | -0.178 (0.112) | -0.035 (0.083) | -0.142(0.099) | -0.024(0.079) |
| How could affect your health | -0.145 (0.089) | 0.001 (0.092) | -0.051(0.091) | -0.022(0.084) |
| Improving their quality of life | -0.060 (0.123) | 0.104 (0.078) | -0.039(0.112) | 0.105(0.071) |
| Characteristics not listed above | -0.026 (0.126) | 0.162 (0.088) | 0.005(0.114) | 0.130(0.071) |

NOTE: ** p<.01 * p<.05. Each column details the average marginal effects derived from Poisson regression models linking the reason category with the number of LDKT actions taken; the associated p-value is in parentheses. The ‘Unadjusted Model’ reports bivariate estimates. The ‘Adjusted Model’ includes controls for respondent age, race/ethnicity, sex, education, and relationship to patient. Values are weighted.
